# Supplementary material
Source: PubMed Central journal article supplement (PMC8983439)

| Type of cancer | Bilateral oophorectomy (n=1653) N (%) | Referent women (n=1653) N (%) | Odds ratio (95% CI) | P value |
|----------------|---------------------------------------|-------------------------------|---------------------|---------|
|----------------|---------------------------------------|-------------------------------|---------------------|---------|

|                  |          |          |                  |       |
|------------------|----------|----------|------------------|-------|
| All cancer       | 91 (5.5) | 43 (2.6) | 2.17 (1.50-3.14) | <.001 |
| Gynecologic      | 52 (3.1) | 3 (0.2)  | 17.3 (5.41-55.5) | <.001 |
| Nongynecologic   | 42 (2.5) | 40 (2.4) | 1.05 (0.68-1.64) | .82   |
| Breast           | 14 (0.8) | 13 (0.8) | 1.08 (0.51-2.29) | .85   |
| Gastrointestinal | 6 (0.4)  | 2 (0.1)  | 3.00 (0.61-14.9) | .18   |
| Lung             | 1 (0.1)  | 0 (0.0)  | --               | --    |

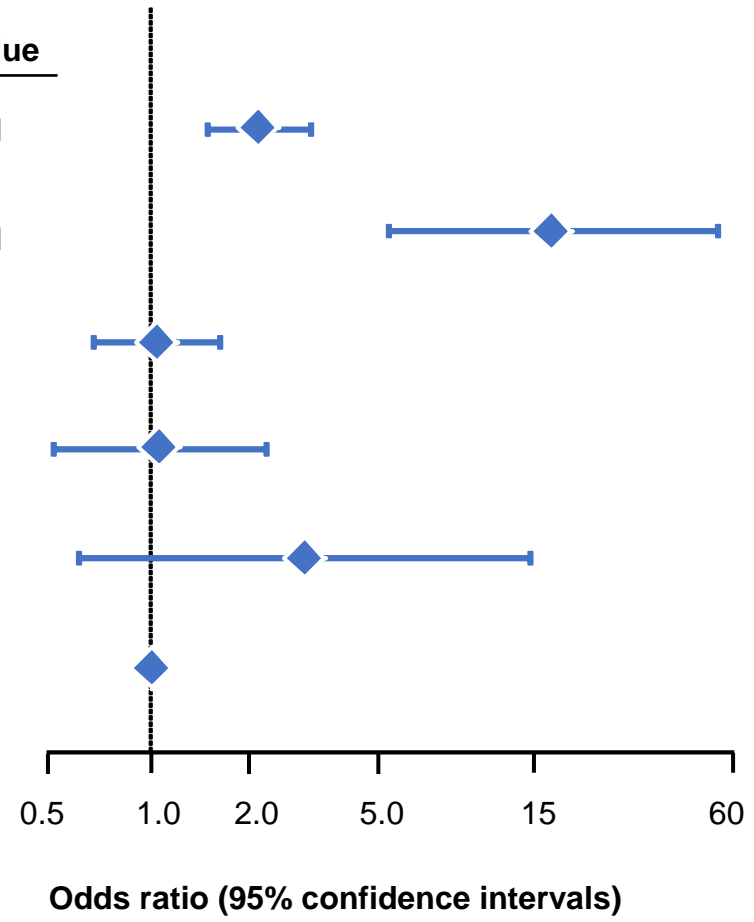

Supplement: NIHMS1756218-supplement-Supp_Fig.pdf [file NIHMS1756218-supplement-Supp_Fig.pdf]
